# Supplementary material for: Interspecies Insertion Polymorphism Analysis Reveals Recent Activity of Transposable Elements in Extant Coelacanths
Source: PubMed Central journal article supplement (PMC4255032; doi:10.1371/journal.pone.0114382), 2014-12-03

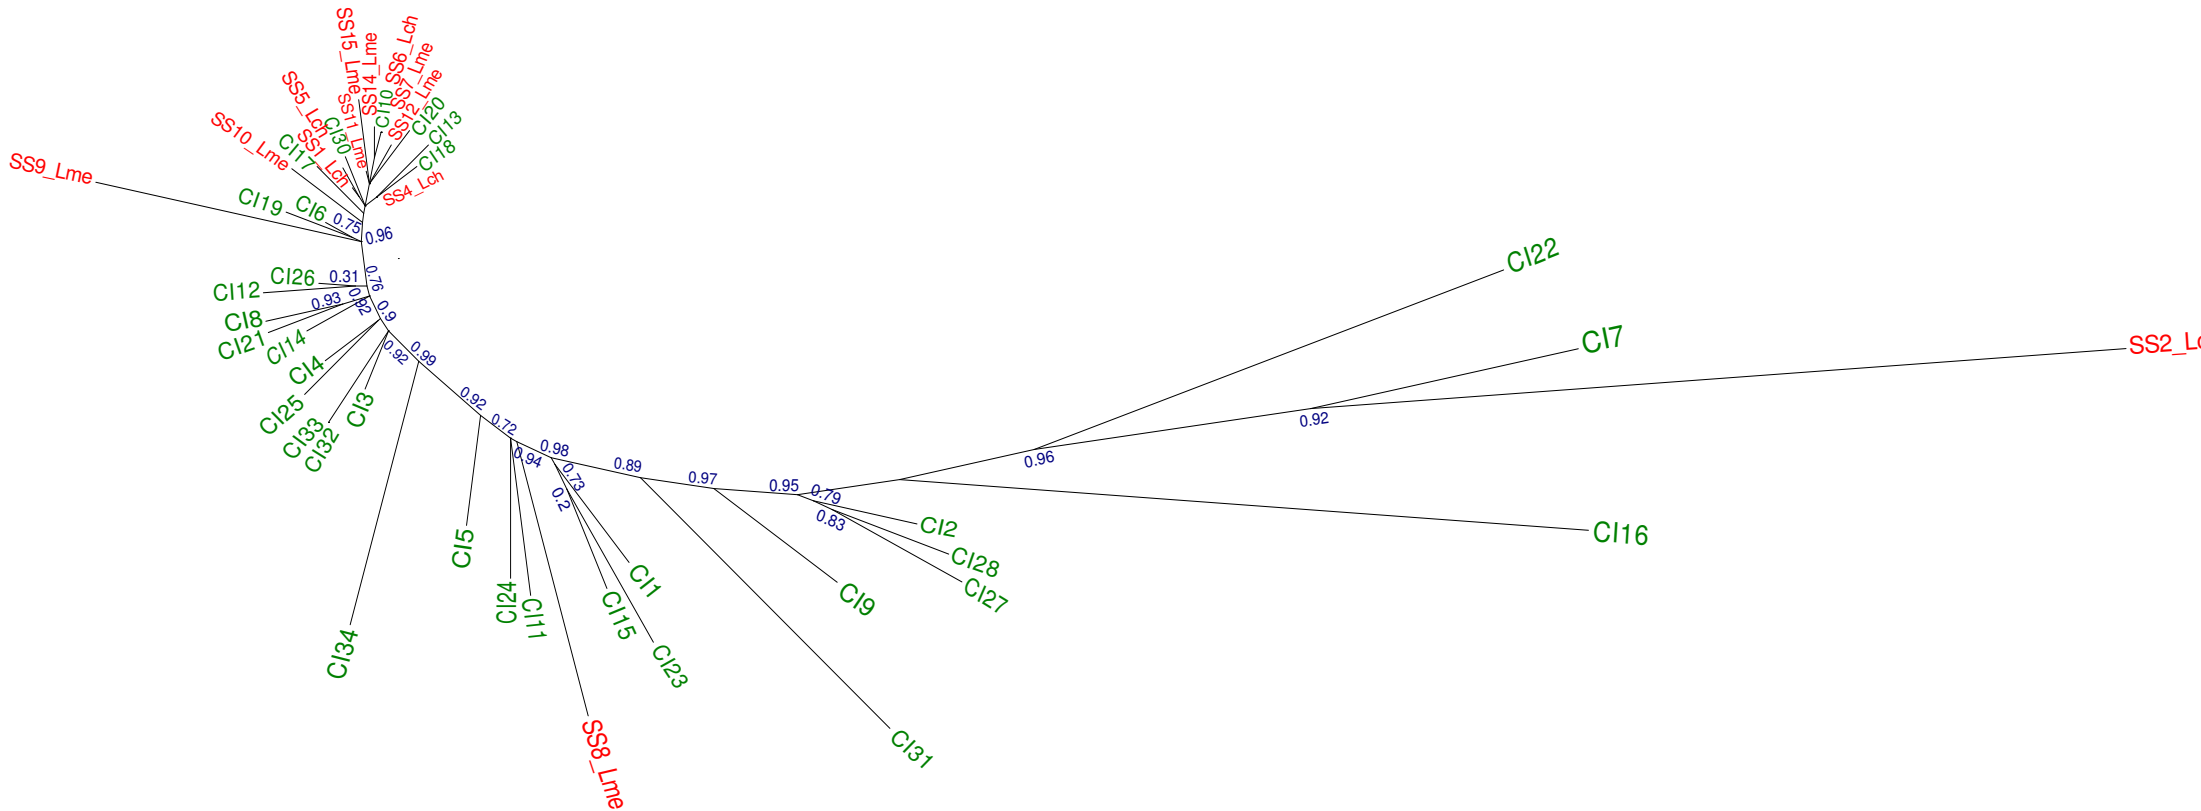

Supplement: pone.0114382.s002.pdf [file pone.0114382.s002.pdf]
