# Supplementary material for: Interspecies Insertion Polymorphism Analysis Reveals Recent Activity of Transposable Elements in Extant Coelacanths
Source: PubMed Central journal article supplement (PMC4255032; doi:10.1371/journal.pone.0114382), 2014-12-03
Supplement: pone.0114382.s004.pdf [file pone.0114382.s004.pdf]

| <i>Latimeria chalumnae</i> |         |         | <i>Latimeria menadoensis</i> |        |        | Match orientation<br>(D: direct ; R:<br>reverse) |
|----------------------------|---------|---------|------------------------------|--------|--------|--------------------------------------------------|
| Scaffold                   | Start   | End     | BAC                          | Start  | End    |                                                  |
| scaffold00009              | 3280929 | 3483227 | GI:305644147                 | 1      | 187889 | R                                                |
| scaffold00056              | 964812  | 1334312 | GI:220898186                 | 1081   | 373046 | R                                                |
| scaffold00059              | 1851179 | 2022554 | GI:190886531                 | 76     | 162566 | R                                                |
| scaffold00118              | 2047028 | 2214133 | GI:239835829                 | 1      | 166048 | D                                                |
| scaffold00119              | 237991  | 385773  | GI:237406519                 | 4976   | 147882 | D                                                |
| scaffold00130              | 383298  | 541448  | GI:164698640                 | 1460   | 160991 | R                                                |
| scaffold00150              | 1900790 | 2213195 | GI:220898172                 | 3028   | 310112 | R                                                |
| scaffold00155              | 44274   | 200545  | GI:239835824                 | 2666   | 156486 | D                                                |
| scaffold00254              | 1       | 176423  | GI:50284580                  | 11746  | 189301 | D                                                |
| scaffold00254              | 183290  | 281494  | GI:50284579                  | 64192  | 150004 | D                                                |
| scaffold00268              | 1477672 | 1759694 | GI:220898198                 | 120021 | 403307 | R                                                |
| scaffold00354              | 106073  | 392205  | GI:407080572                 | 1      | 277163 | D                                                |
| scaffold00384              | 1475305 | 1482115 | GI:239835827                 | 149505 | 156331 | R                                                |
| scaffold00402              | 700544  | 867644  | GI:305644148                 | 1      | 48164  | R                                                |
| scaffold00568              | 506160  | 684015  | GI:239835822                 | 1038   | 174368 | D                                                |
| scaffold00606              | 930938  | 1090454 | GI:239835825                 | 1      | 159151 | D                                                |
| scaffold00623              | 215249  | 743013  | GI:220898210                 | 2721   | 510561 | R                                                |
| scaffold00705              | 768998  | 874922  | GI:239835826                 | 29792  | 133856 | D                                                |
| scaffold00739              | 14474   | 181508  | GI:193083250                 | 3996   | 162395 | R                                                |
| scaffold00744              | 441927  | 611074  | GI:239835828                 | 1      | 168867 | R                                                |
| scaffold01111              | 1028    | 121776  | GI:220898198                 | 1876   | 110715 | R                                                |
| scaffold01303              | 366622  | 554618  | GI:189459217                 | 1354   | 181534 | D                                                |
| scaffold01377              | 359867  | 508183  | GI:239835830                 | 1      | 145595 | D                                                |
| scaffold01558              | 242036  | 417321  | GI:50284581                  | 1      | 170774 | D                                                |
| scaffold01558              | 440137  | 569572  | GI:50253612                  | 34992  | 161955 | D                                                |
| scaffold01681              | 112207  | 292021  | GI:239835823                 | 2188   | 173770 | R                                                |
| scaffold01694              | 223609  | 452608  | GI:407080573                 | 1      | 210648 | R                                                |
| scaffold01718              | 346125  | 497225  | GI:296011776                 | 3222   | 146768 | D                                                |
| scaffold01893              | 352535  | 452619  | GI:170514516                 | 8680   | 103197 | D                                                |
| scaffold01950              | 44085   | 185500  | GI:239835827                 | 1963   | 139437 | R                                                |
| scaffold01958              | 308291  | 432348  | GI:239735715                 | 3441   | 123477 | D                                                |
| scaffold03191              | 32534   | 87846   | GI:66912372                  | 29226  | 85540  | R                                                |
| scaffold04994              | 1       | 55609   | GI:170514516                 | 109303 | 160968 | R                                                |
| scaffold06915              | 81      | 12807   | GI:66912372                  | 13200  | 26009  | D                                                |
| scaffold12374              | 692     | 4651    | GI:239835826                 | 8731   | 12694  | R                                                |
