# Supplementary material for: Interspecies Insertion Polymorphism Analysis Reveals Recent Activity of Transposable Elements in Extant Coelacanths
Source: PubMed Central journal article supplement (PMC4255032; doi:10.1371/journal.pone.0114382), 2014-12-03
Supplement: pone.0114382.s005.pdf [file pone.0114382.s005.pdf]

| Insertion ID | Coordinates of insertion/ empty site in <i>L. chalumnae</i> | Coordinates of insertion/ empty site in <i>L. menadoensis</i> | Closest gene ( <i>L. chalumnae</i> ortholog identifier)           |
|--------------|-------------------------------------------------------------|---------------------------------------------------------------|-------------------------------------------------------------------|
| 1            | <b>Scaffold00623:444,442-446,063</b>                        | GI:220898210:285,592                                          | ENSLACG00000009639 ( <i>HOXD12</i> )                              |
| 2            | <b>Scaffold00118:2,061,845-2,062,904</b>                    | GI:239835829:14,875                                           | ENSLACG00000017224 ( <i>GRID1</i> )                               |
| 3            | <b>Scaffold00254:143,688-144,784</b>                        | GI:50284580:156,232                                           | ENSLACG00000003645 ( <i>PCDHGC</i> )                              |
| 4            | <b>Scaffold01694:371,635-371,861</b>                        | GI:407080573:70,685                                           | ENSLACG00000008667 ( <i>ighv14-1 (21)</i> )                       |
| 5            | <b>Scaffold01958:325,272-325,591</b>                        | GI:239735715:18,223                                           | ENSLACG00000008317 (vomeronasal 2 receptor)                       |
| 6            | <b>Scaffold01111:49,937-50,239</b>                          | GI:220898198:68,977                                           | ENSLACG00000008634 ( <i>CALCOCO1</i> )                            |
| 7            | Scaffold01377:369,609                                       | <b>GI:239835830:9,808-12,652</b>                              | No gene on scaffold01377                                          |
| 8            | Scaffold00254:219,610                                       | <b>GI:50284579:89,241-92,061</b>                              | ENSLACG00000006212 ( <i>PCDHGC5</i> )                             |
| 9            | Scaffold00254:225,605                                       | <b>GI:50284579:95,826-96,999</b>                              | ENSLACG00000007011 ( <i>PCDHGC5</i> )                             |
| 10           | Scaffold00254:159,054                                       | <b>GI:50284580:170,519-171,556</b>                            | ENSLACG00000003645 ( <i>PCDHGC</i> )                              |
| 11           | Scaffold01558:304,507                                       | <b>GI:50284581:55,931-56,792</b>                              | ENSLACG00000007697 ( <i>SRA1</i> )                                |
| 12           | Scaffold00056:1,246,007                                     | <b>GI:220898186:86,058-87,455</b>                             | ENSLACG00000015543 ( <i>HOXB13</i> )                              |
| 13           | Scaffold00254:99,438                                        | <b>GI:50284580:111,150-112,168</b>                            | ENSLACG00000003645 ( <i>PCDHGC</i> )                              |
| 14           | Scaffold01694:291,311                                       | <b>GI:407080573:145,750-146,134</b>                           | ENSLACG00000007502 ( <i>ighm</i> )                                |
| 15           | Scaffold01558:396,181                                       | <b>GI:50284581:149,127-149,513</b>                            | ENSLACG00000008820 (FAT tumor suppressor homolog)                 |
| 16           | Scaffold00268:1,507,311                                     | <b>GI:220898198:371,470-373,637</b>                           | ENSLACG00000016368 ( <i>hoxc1a</i> )                              |
| 17           | Scaffold01694:~445,237                                      | <b>GI:407080573:~4,900-6,898</b>                              | ENSLACG00000009775 ( <i>ighv14-1 (25)</i> )                       |
| 18           | <b>Scaffold00254:219,832-222,050</b>                        | GI:50284579:92,281                                            | ENSLACG00000006212 ( <i>PCDHGC</i> )                              |
| 19           | <b>Scaffold00354:~368,219-369,580</b>                       | GI:407080572:~254,678                                         | ENSLACG00000008465 (von Willebrand factor A domain containing 5A) |
| 20           | Scaffold00623:265,988                                       | <b>GI:220898210:249,373-250,390</b>                           | ENSLACG00000010437 ( <i>EVX2</i> )                                |
| 21           | <b>Scaffold00402:858,209-858,599</b>                        | GI:305644148:8,349                                            | ENSLACG00000013670 (uncharacterized protein)                      |
| 22           | <b>Scaffold00402:858,000-859,286</b>                        | GI:305644148:8,349                                            | ENSLACG00000013670 (uncharacterized protein)                      |
| 23           | Scaffold01694:351,066 (solo LTR)                            | <b>GI:407080573:91,275-96,365</b>                             | ENSLACG00000008667 ( <i>ighv14-1 (21)</i> )                       |
| 24           | <b>Scaffold00354:388,393-388,617</b>                        | GI:407080572:273577                                           | ENSLACG00000008465 (von Willebrand factor A domain containing 5A) |
| 25           | <b>Scaffold00739:136,634-137,944</b>                        | GI:193083250:45,783                                           | ENSLACG00000004838 ( <i>CHRNB4</i> )                              |
| 26           | <b>Scaffold01681:185,790-188,092</b>                        | GI:239835823:103,074                                          | ENSLACG00000001393 ( <i>CRHR2</i> )                               |
| 27           | Scaffold03191:46,696                                        | <b>GI:66912372:70,080-71,328</b>                              | No gene on scaffold03191                                          |
